# Supplementary material for: Malonylation of GAPDH is an inflammatory signal in macrophages
Source: PubMed Central journal article supplement (PMC6338787; doi:10.1038/s41467-018-08187-6), 2019-01-18

## Supplementary information

### Malonylation of GAPDH is an inflammatory signal in macrophages

Galván-Peña *et al*

**a Gene: Acaca**

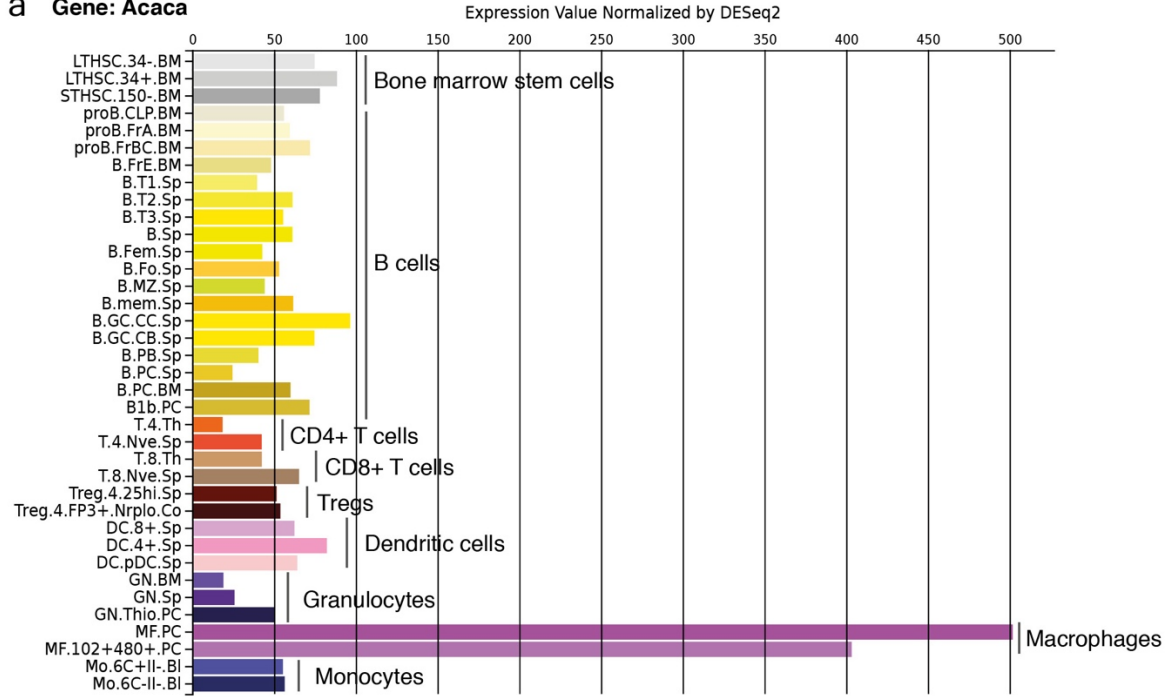

**b Gene: Acacb**

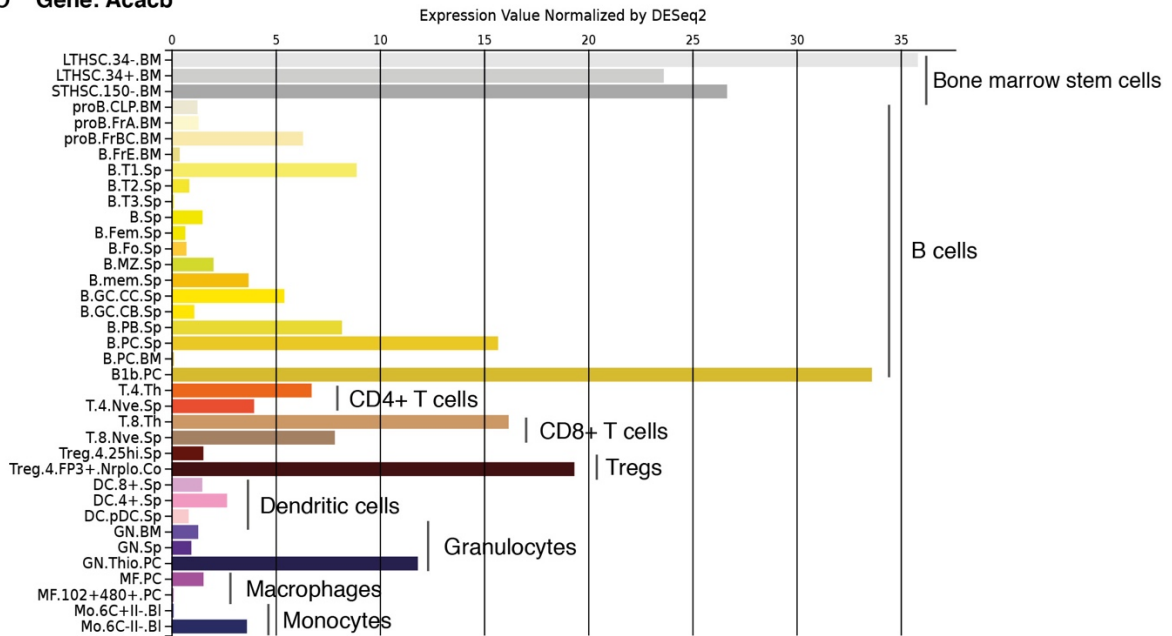

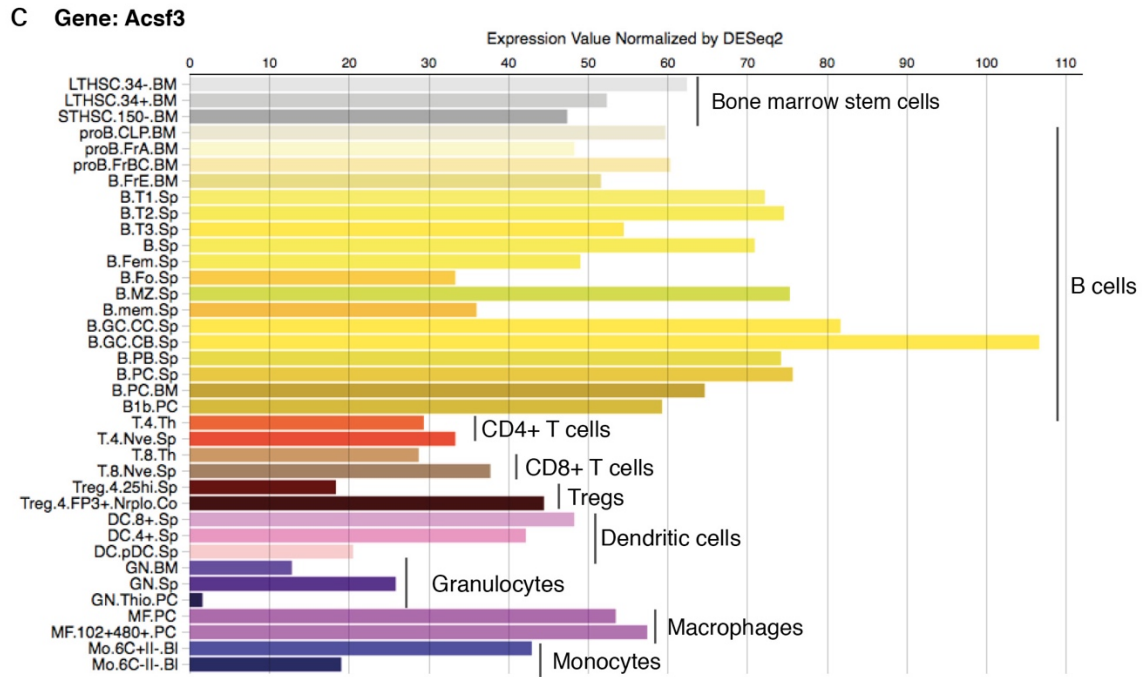

**Supplementary figure 1. ACC1, ACC2 and ACSF3 gene expression across immune cell types.**

*Acaca*, *Acacb* and *Acsf3* gene expression data from ULI RNASeq, obtained using the RNASeq Skyline data browser from the Immgen Consortium. BM (bone marrow); Sp (spleen); PC (peritoneal cavity); Co (colon); Bl (blood); LTHSC (long term hematopoietic stem cells); STHSC (short term hematopoietic stem cells); CLP (common lymphoid progenitor); Fo (follicular); MZ (marginal zone); mem (memory); fem (female); GC.CC (germinal centres centrocytes); GC.CB (germinal centres centroblasts); PB (plasmablasts); T4.Th (CD4+ thymocytes); T8.Th (CD8+ thymocytes); GN (neutrophil); MF (macrophage).

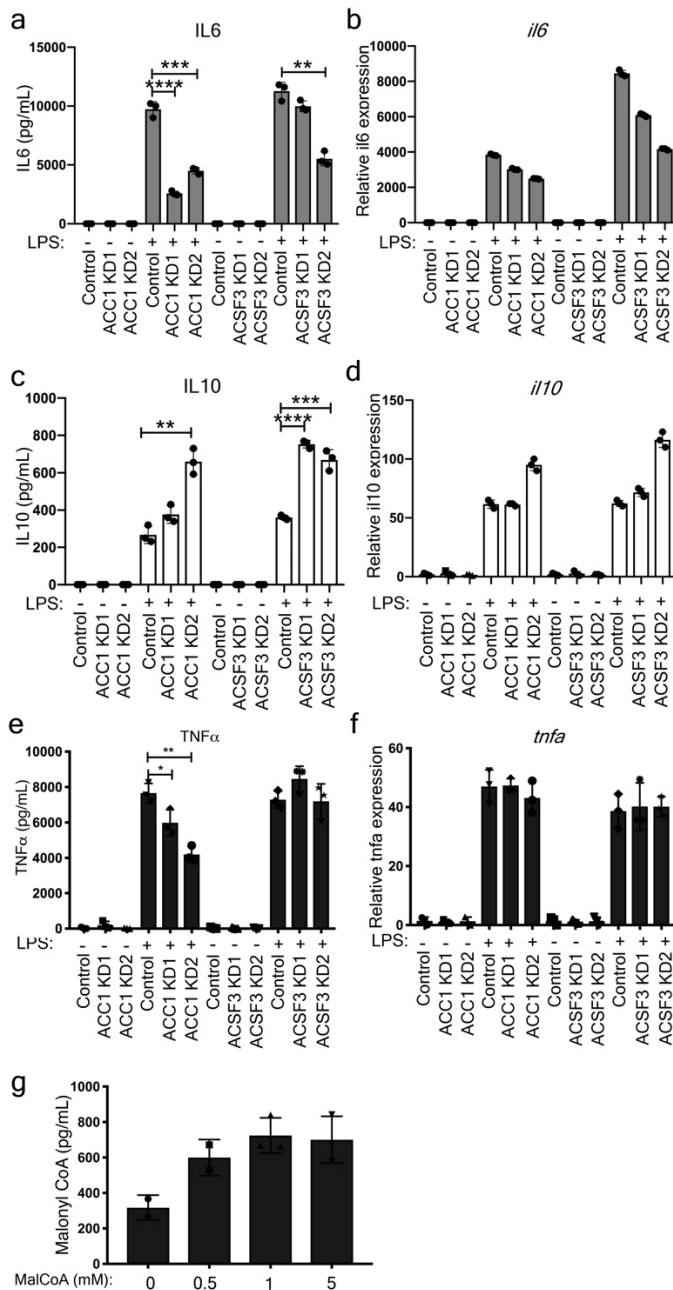

**Supplementary figure 2. IL6 and IL10 expression in LPS-treated ACC1 and ACSF3 KD BMDMs.**

**a**, IL6 protein measured by ELISA (24h, mean + SEM, n=3) and **b**, IL6 mRNA expression in 100 ng/mL LPS-treated ACC1 and ACSF3 KD BMDMs (6h, mean + SD, representative of three independent experiments). **c**, IL10 protein measured by ELISA (24h, mean +SEM, n=3) and **d**, IL10 mRNA expression in 100 ng/mL LPS-treated ACC1 and ACSF3 KD BMDMs, (24h, mean +SD, representative of three independent experiments). **e**, TNF $\alpha$  protein measured by ELISA (mean + SEM, n=3) and **f**, TNF $\alpha$  mRNA expression in 100 ng/mL LPS-treated (100 ng/mL, 24h) ACC1 and ACSF3 KD BMDMs (mean + SD, representative of three independent experiments) **g**, Malonyl-CoA levels measured in malonyl-CoA treated BMDMs using a malonyl-CoA ELISA. Unpaired student's t test, \*\*p < 0.01; \*\*\* p < 0.005; \*\*\*\* p < 0.001.

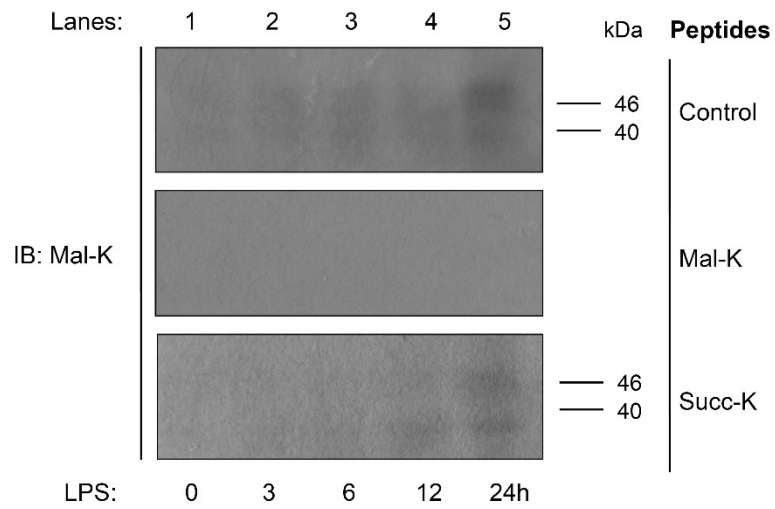

**Supplementary figure 3. Testing of anti-malonyl-lysine antibody specificity through peptide competition.**

Anti-mal-K antibody was pre-incubated with either succ-K peptide, mal-K peptide, or no peptide, prior to its use in the analysis of mal-K levels via western blotting. BMDMs were treated with 100 ng/mL LPS. Results representative of three independent experiments.

a

| MS/MS spectrum database search analysis summary |                       |                  |                    |
|-------------------------------------------------|-----------------------|------------------|--------------------|
| Identified proteins                             | Quantifiable proteins | Identified sites | Quantifiable sites |
| 513                                             | 412                   | 1075             | 843                |

b

| Sites differentially modified by LPS |          |       |
|--------------------------------------|----------|-------|
| Regulation                           | Proteins | Sites |
| Upregulated                          | 98       | 123   |
| Downregulated                        | 12       | 13    |

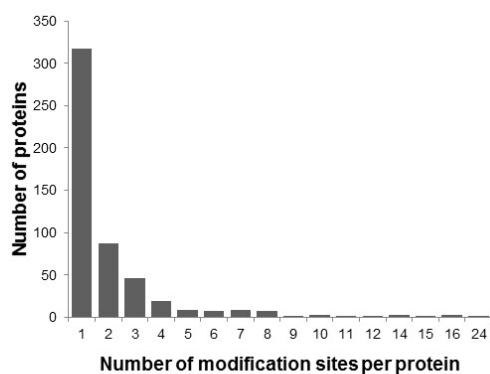

c

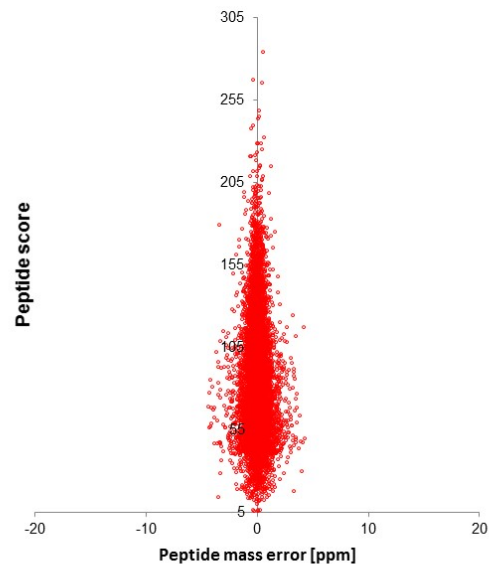

#### Supplementary figure 4. Malonylated peptides identified on untreated and LPS-treated BMDMs

**a**, Summary of the results obtained from the identification of malonylated peptides in bone marrow-derived macrophages through mass spectrometry. **b**, Number of statistically significant proteins and sites identified as undergoing malonylation ( $\geq 1.5$  fold) following 24h of LPS treatment (p value  $< 0.05$ ), or present only in untreated vs LPS-treated samples (n=3). **c**, Peptide scores and peptide mass error measured for quality control of the peptides identified via mass spectrometry.

a

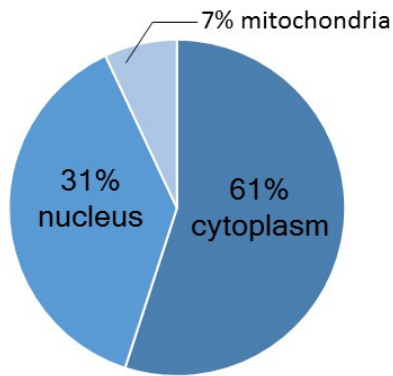

b

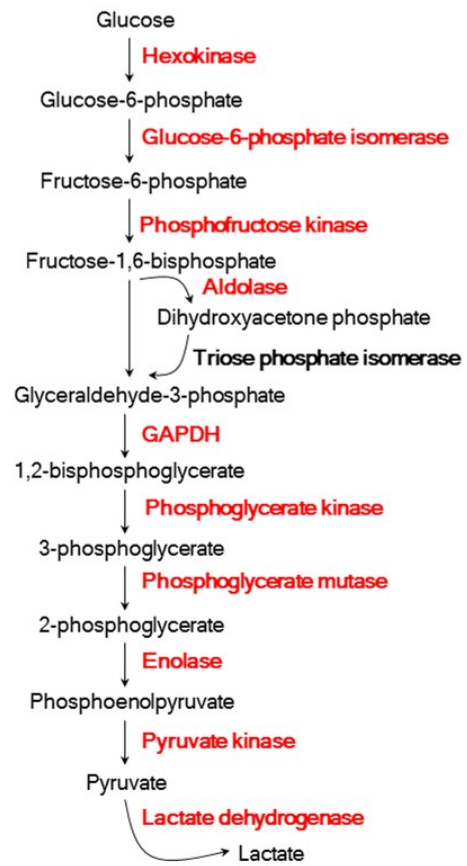

**Supplementary figure 5. a**, Cellular distribution of identified LPS-malonylated proteins. **b**, LPS-malonylated enzymes in glycolysis, as identified via mass-spectrometry.

GAAQNIIPASTGAAKmalAVGK

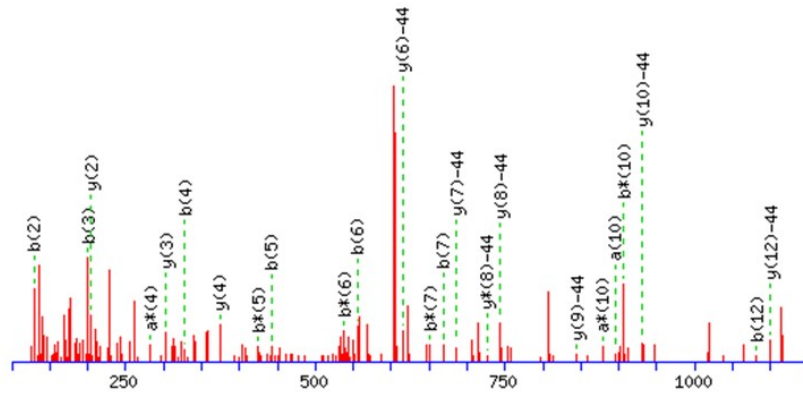

TVDGPSGKmalLWR

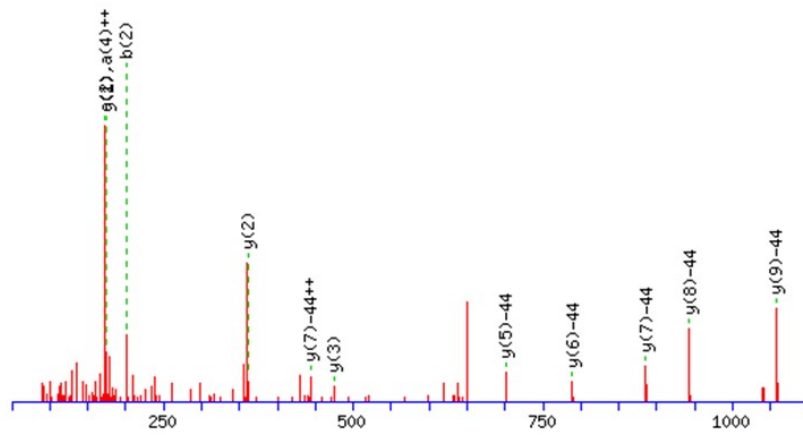

### Supplementary figure 6. MS/MS spectra of malonylated peptides identified in GAPDH

MS/MS spectra from the malonylated peptides detected on a Q-Exactive Orbitrap mass spectrometer following immunoprecipitation of GAPDH from BMDMs and trypsin-digestion.



a

|            |                                                    |             |     |
|------------|----------------------------------------------------|-------------|-----|
|            |                                                    | <b>K213</b> |     |
| Human      | KLWRDGRGAAQNIIPASTGAAKAVGKVIPELNGKLTGMAFRVPTPNVSVV |             | 241 |
| Mouse      | KLWRDGRGAAQNIIPASTGAAKAVGKVIPELNGKLTGMAFRVPTPNVSVV |             | 241 |
| Rat        | KLWRDGRGALQNIIPASTGAAKAVGKVIPELDGKLTGMAFRVPTANVSVV |             | 243 |
| C. Elegans | KLWRDGRGAGQNIIPASTGAAKAVGKVIPELNGKLTGMAFRVPTPDVSVV |             | 249 |
| E.Coli     | KDLRASRAAAENIIPHTTGAAKAIGLVIPELSGKLGHAQRVPVKTGSVT  |             | 241 |

b

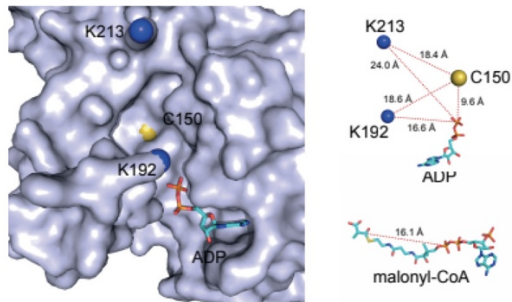

c

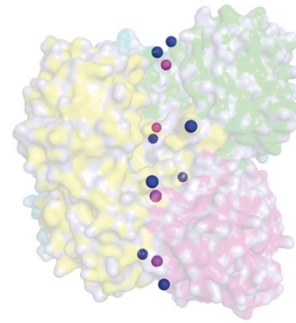

### Supplementary figure 7. K213 sequence alignment and positioning in the GAPDH structure.

**a**, Sequence alignment of an amino acid fragment of GAPDH across multiple species. **b**, The ADP moiety of NAD is shown in the NAD-bound structure of bovine GAPDH (4O59), as well as the geometry of the ADP-binding site relative to C150, K192 and K213, together with the flexible pantetheine moiety of malonyl-CoA. **c**, K192, K213 (blue) and T227 (pink) positioning along the dimerization and RNA-binding cleft of GAPDH.

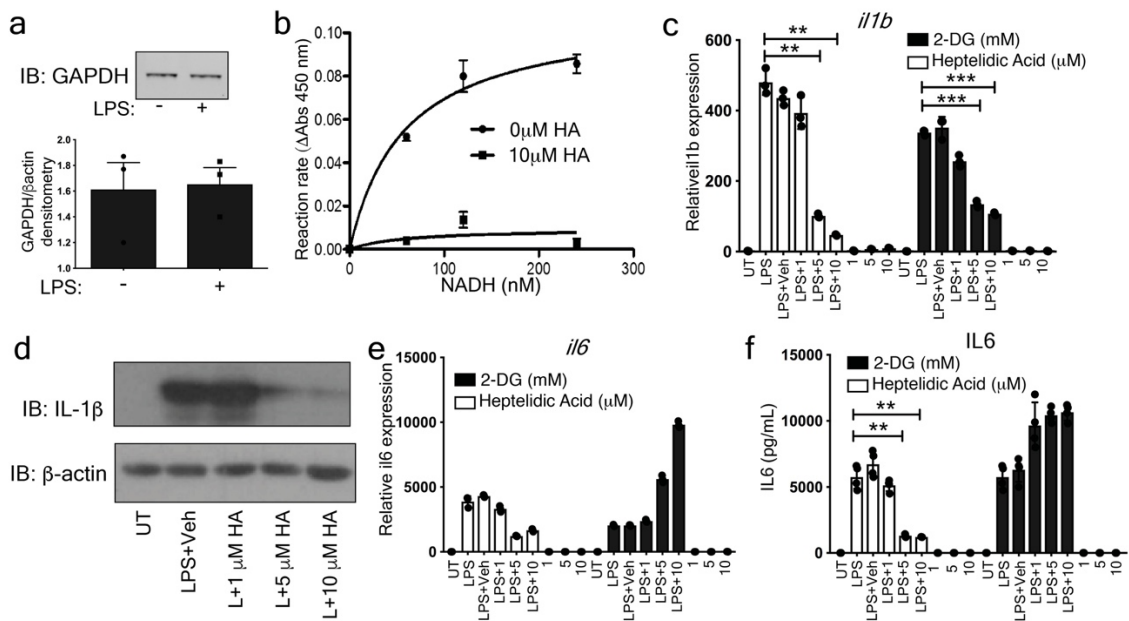

**Supplementary figure 8. HA inhibits GAPDH enzymatic activity and also blocks IL1 $\beta$  and IL6 production.**

**a**, GAPDH expression in untreated and LPS-treated (24h) BMDMs **b**, GAPDH enzymatic activity measured at 340 nm with various concentrations of NADH in lysates treated with 10  $\mu$ M HA. **c**, IL1 $\beta$  mRNA expression in 100 ng/mL LPS-treated BMDMs (6h), pre-treated with HA or 2-DG (mean + SEM, n=4). **d**, Pro-IL1 $\beta$  protein measured by western blotting in 100 ng/mL LPS-treated BMDMs pre-treated with HA. **e**, IL6 mRNA expression and **f**, IL6 protein expression in 100 ng/mL LPS-treated BMDMs (6h), pre-treated with HA or 2DG (mean + SEM, n=4). Unpaired student's t test, \*\*p < 0.01; \*\*\* p < 0.005

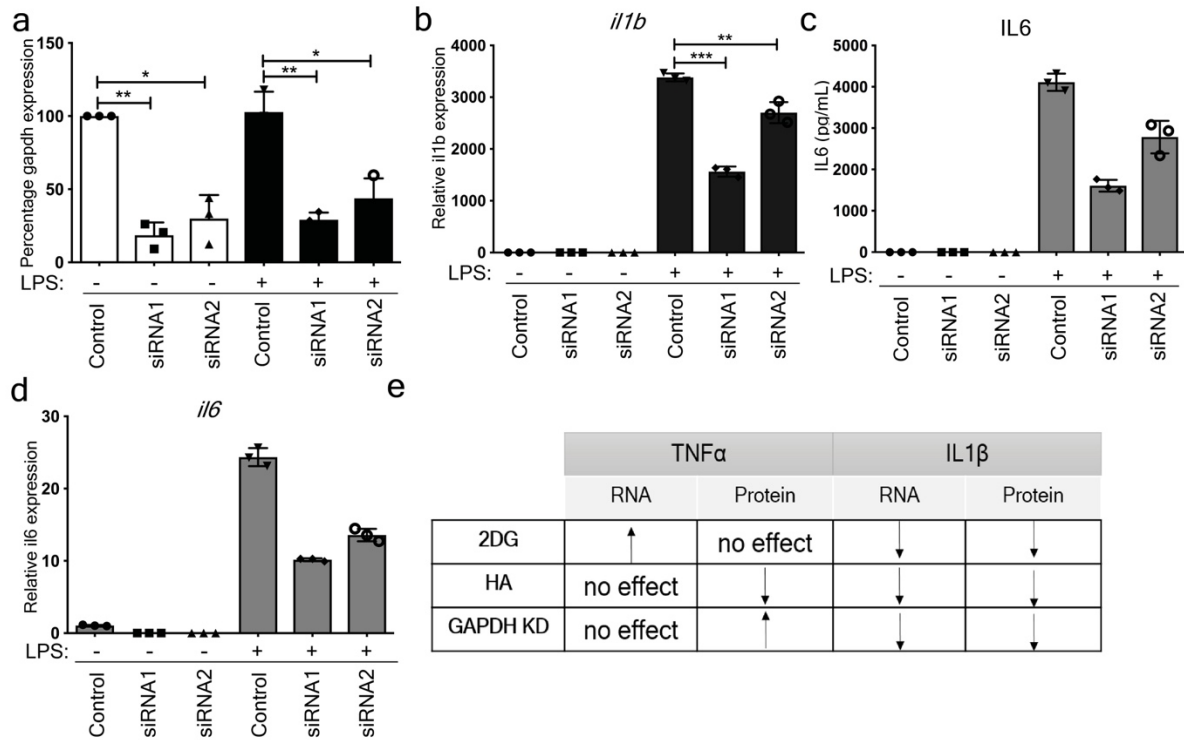

### Supplementary figure 9. GAPDH KD reduces IL1 $\beta$ and IL6 production

**a**, GAPDH expression following siRNA KD (72h, 10nM), measured by qPCR and normalised to 18S expression, and depicted as percentage relative to control (mean + SEM, n=3) **b**, IL1 $\beta$  mRNA expression in 100 ng/mL LPS-treated GAPDH KD BMDMs. **c**, IL6 protein measured by MSD and **d**, IL6 mRNA expression measured by qPCR in LPS-treated GAPDH KD BMDMs. **e**, Summary of HA, 2DG and GAPDH KD results. Unpaired student's t test, \*p < 0.05; \*\*p < 0.01; \*\*\* p < 0.005.

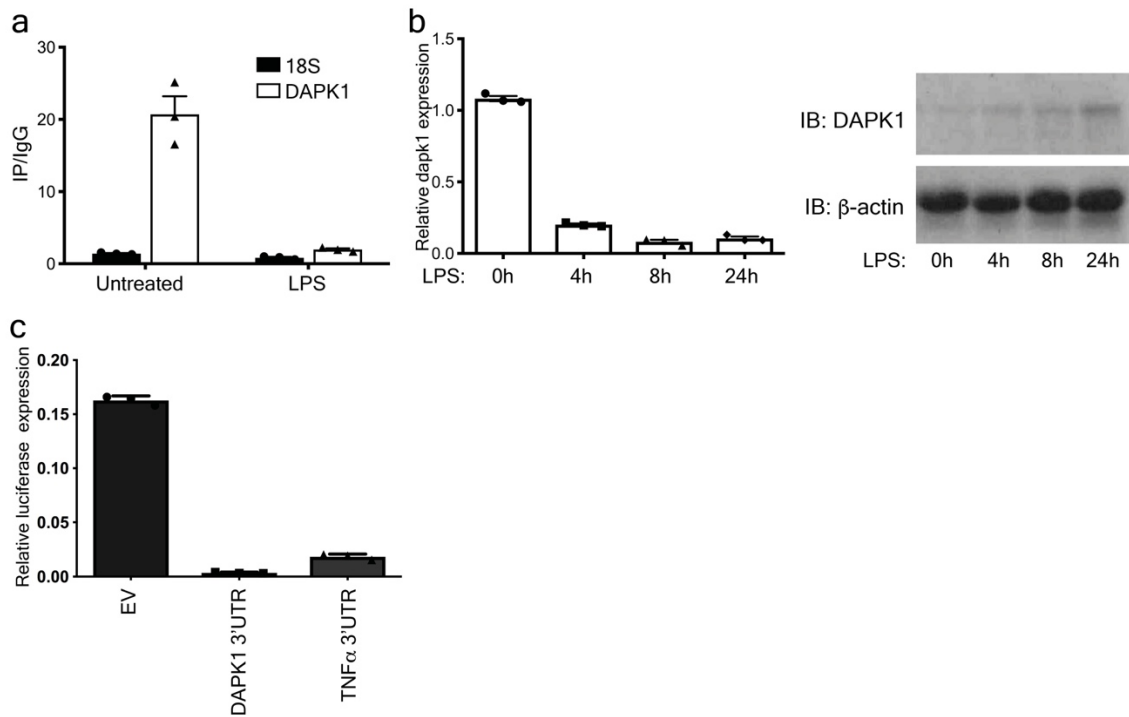

**Supplementary figure 10. GAPDH negatively regulates DAPK1 through RNA-binding**

**a**, GAPDH was immunoprecipitated from untreated and LPS-treated (24h, 100 ng/mL) BMDMs, and DAPK1 mRNA presence assessed via qPCR. **b**, DAPK1 mRNA expression measured by qPCR and DAPK1 protein measured via western blotting in BMDMs treated with LPS (100 ng/mL) over time. **c**, Luciferase activity of an empty vector (EV), DAPK1 3'-UTR, TNF $\alpha$  3'UTR luciferase constructs. Renilla luciferase expression was normalised to firefly luciferase activity. Mean + SD of three independent experiments.

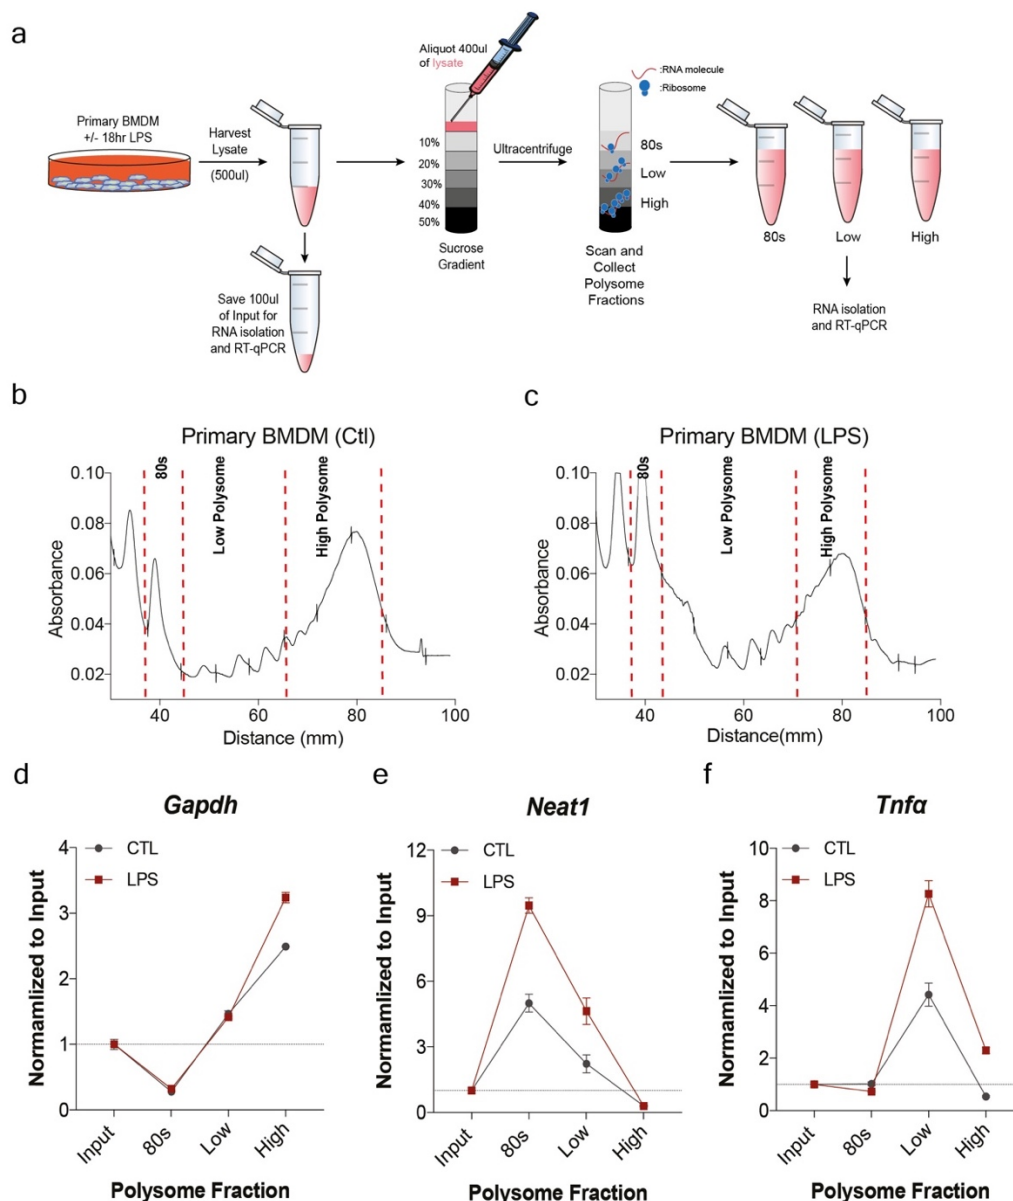

### Supplementary figure 11. LPS increases TNF $\alpha$ translation

**a**, Overview of the polysome profiling protocol to analyze translation activity. The various steps of the protocol involve cell lysis, sucrose gradient centrifuge, RNA extraction and analysis of translation status of mRNAs by RT-qPCR. **b**, **c**, Cytoplasmic lysates from control (b) and LPS treated cells (c) were fractionated through sucrose gradients. Global RNA polysome profiles generated by the density gradient fractionation system are shown. Results representative of four independent experiments. **d**, **e**, **f**, The relative distribution of *Gapdh* mRNA (d), encoding a housekeeping protein, *Neat1* long non-coding RNA (lncRNA) (e) and *Tnfa* mRNA (f) were measured by RT-qPCR analysis of RNA. Each of the gradient fractions are calculated as relative enrichment when compared to unfractionated input mRNA. Experiment performed in biological quadruplicates.

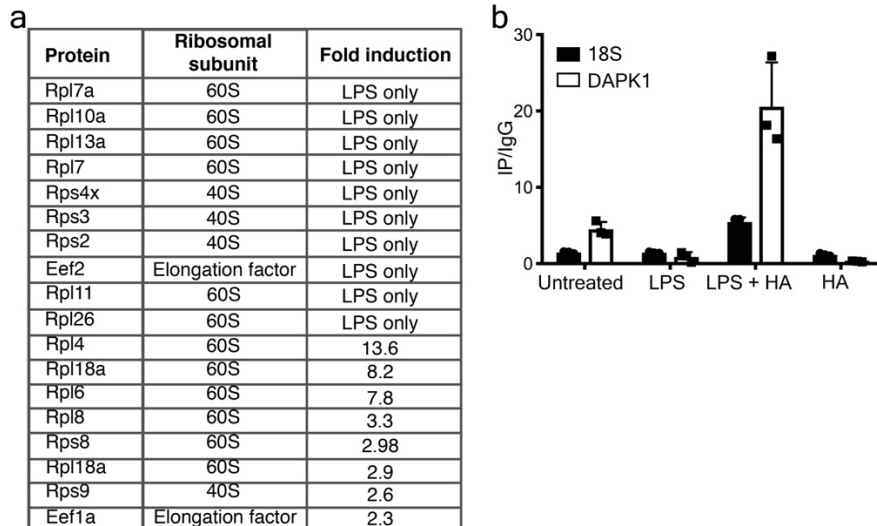

**Supplementary figure 12. GAPDH-interacting translation-associated proteins and HA effect on DAPK1 RNA-binding**

**a**, Proteins associated with translation identified as interacting with GAPDH via mass spectrometry in BMDMs treated with LPS (100ng/mL, 24h) when compared to untreated BMDMs (minimum 2-fold). **b**, LPS-treated (100 ng/mL, 24h) BMDMs pre-treated with HA (10  $\mu$ M) and GAPDH immunoprecipitated. Bound DAPK1 mRNA was assessed by qPCR. Data shown is representative of three independent experiments.

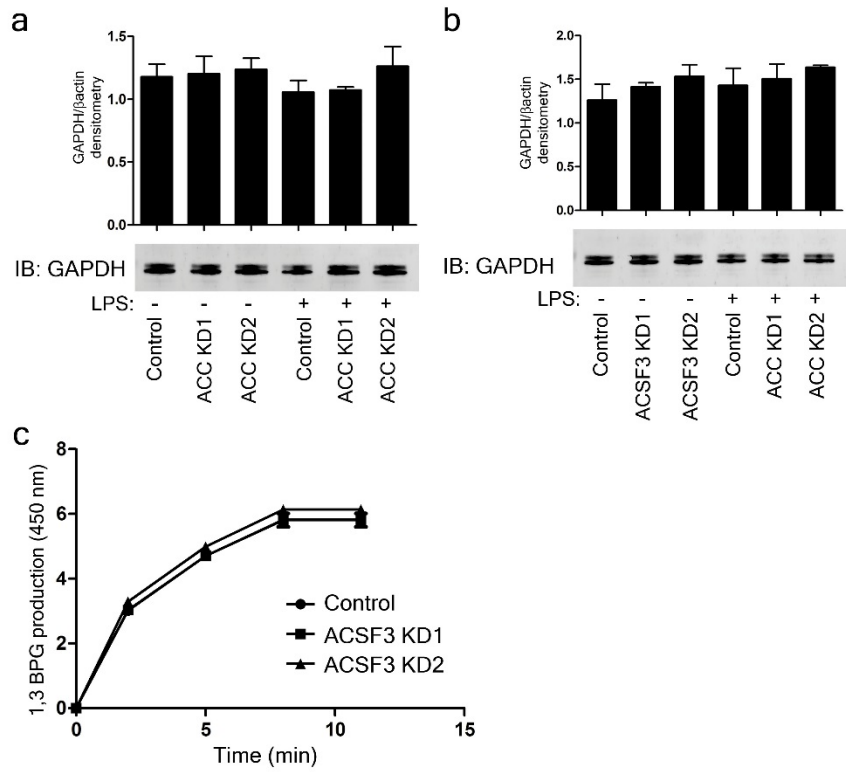

**Supplementary figure 13. GAPDH expression and enzymatic activity in ACC1 and ACSF3 KD.**

GAPDH expression in **a**, ACC1 and **b**, ACSF3 KD BMDMs. **c**, GAPDH enzymatic activity in ACSF3 KD (LPS-treated, 100 ng/mL, 24h).

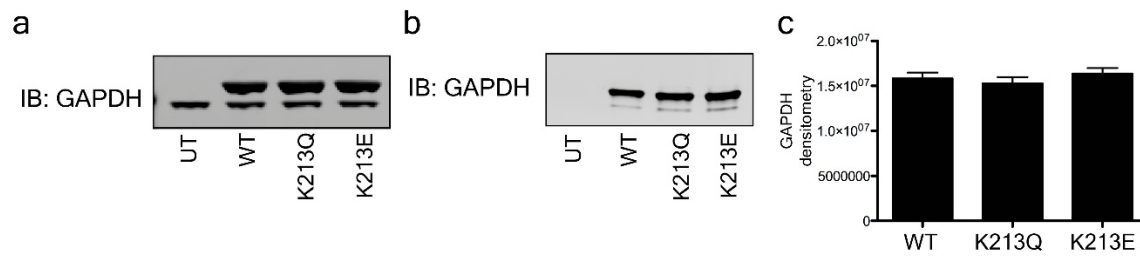

**Supplementary figure 14. Expression of WT, K213Q and K213E GAPDH mutants.**

**a**, GAPDH expression in HEK293T transfected with WT, K213Q and K213E constructs. **b**, Expression levels of affinity-purified GAPDH variants. **c**, Quantification of GAPDH affinity-purified variants from western blot expression using the image studio software. Mean + SEM of three independent blots.



Supplementary figure 15 – uncropped western blot images from the main figures

Figure 1c

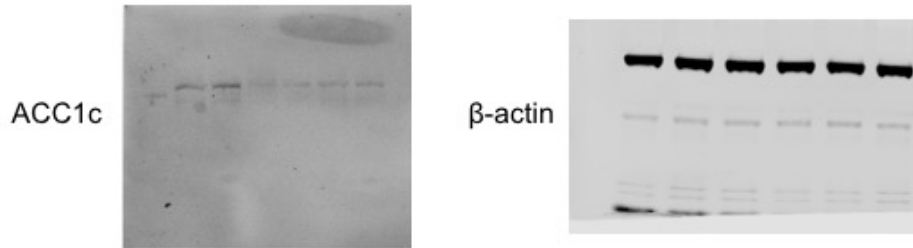

Figure 2a

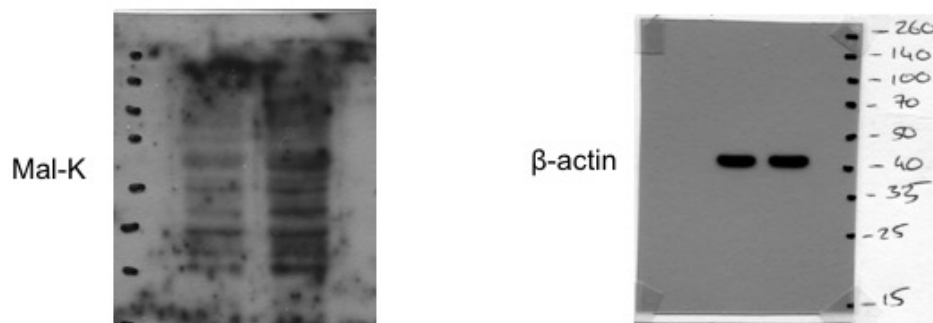

Figure 2c

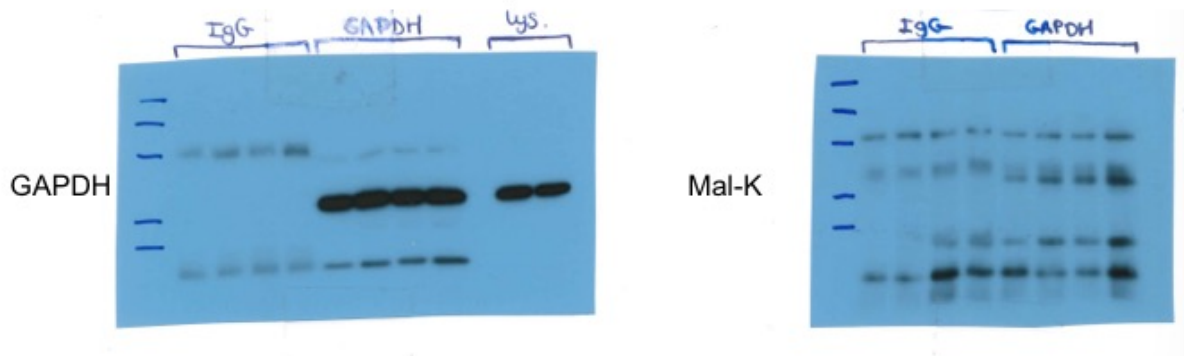

Figure 2d

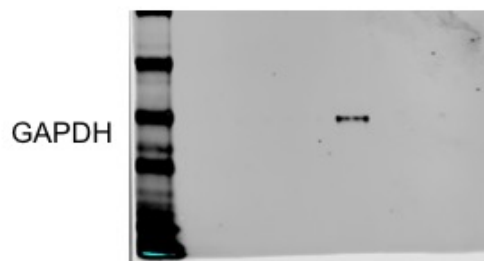

**Figure 2f**

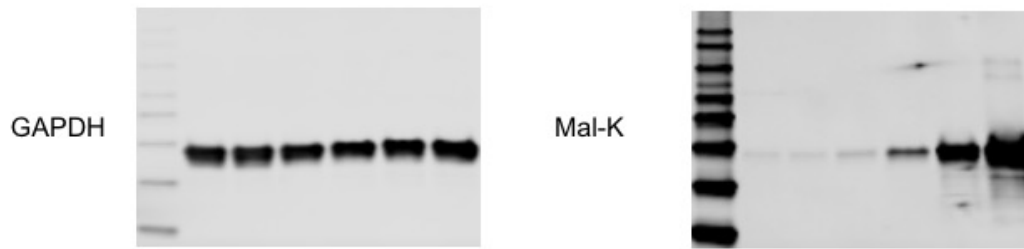

**Figure 2h**

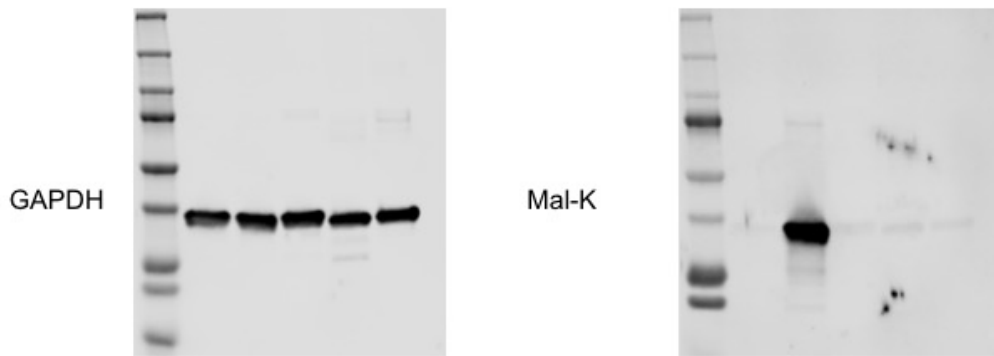

**Figure 3d**

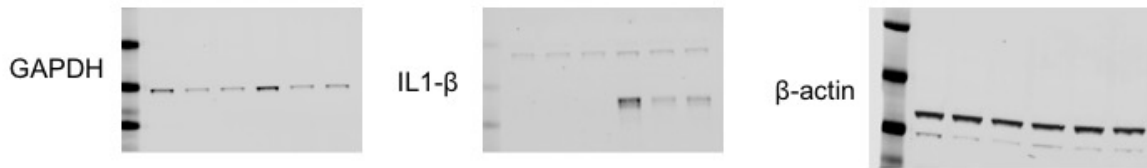

**Figure 4d**

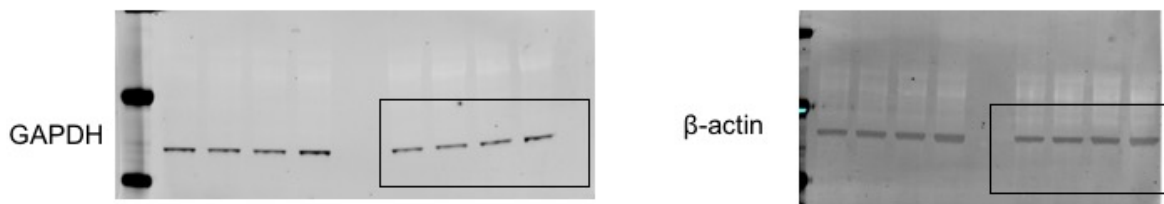

**Figure 5c**

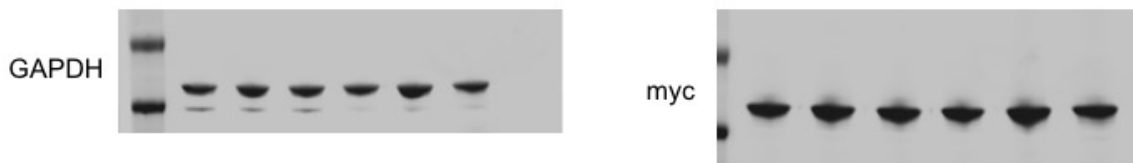

Supplement: 41467_2018_8187_MOESM1_ESM.pdf [file 41467_2018_8187_MOESM1_ESM.pdf]
